# Supplementary material for: Biomarkers Associated with Failure of Liberation from Oxygen Therapy in Severe COVID-19: A Pilot Study
Source: MDPI journal article supplement (doi:10.3390/jpm11100974), 2021-09-29
Supplement: s1 [file s1]

**Table S1.** Clinical variables and laboratory parameters during hospitalization according to oxygen therapy status at day 28.

|                                    | Baseline            | Day 4              | Day 7              | AUC                   | <i>p</i> |
|------------------------------------|---------------------|--------------------|--------------------|-----------------------|----------|
| SpO <sub>2</sub> /FiO <sub>2</sub> |                     |                    |                    |                       | 0.87     |
| Weaning failure                    | 157 (124–190)       | 204 (188–238)      | 192 (176–214)      | 38 (15–62)            |          |
| Weaning success                    | 208 (159–297)       | 241 (220–317)      | 292 (248–350)      | 32 (-4 to 69)         |          |
| Radiologic score                   |                     |                    |                    |                       | 0.95     |
| Weaning failure                    | 6 (3–7)             | 4 (2–6)            | 2 (2–4)            | -1 (-2 to 0)          |          |
| Weaning success                    | 4 (3–6)             | 3 (2–4)            | 2 (2–3)            | -1 (-2 to 0)          |          |
| Neutrophil lymphocyte ratio        |                     |                    |                    |                       | 0.04     |
| Weaning failure                    | 10.0 (6.2–23.5)     | 12.3 (9.6–23.0)    | 16.6 (8.8–23.0)    | 1.8 (0.5–6.2)         |          |
| Weaning success                    | 6.8 (4.1–14.0)      | 6.7 (4.1–10.5)     | 6.8 (4.3–9.6)      | -0.4 (-5.1–2.1)       |          |
| Lactate dehydrogenase, IU/L        |                     |                    |                    |                       | 0.26     |
| Weaning failure                    | 436 (370–638)       | 403 (380–504)      | 424 (336–476)      | -24 (-93 to 11)       |          |
| Weaning success                    | 404 (345–489)       | 332 (293–392)      | 282 (251–359)      | -63 (-104 to -7)      |          |
| C-reactive protein, mg/L           |                     |                    |                    |                       | 0.61     |
| Weaning failure                    | 119 (56–214)        | 40 (29–101)        | 23 (14–83)         | -62 (-118 to -24)     |          |
| Weaning success                    | 104 (62–148)        | 28 (18–43)         | 7 (2–25)           | -53 (-88 to -27)      |          |
| Ang-1, pg/mL                       |                     |                    |                    |                       | 0.96     |
| Weaning failure                    | 2199 (859–10178)    | 3690 (2070–5623)   | 3381 (1980–5962)   | 1056 (-1036 to 2430)  |          |
| Weaning success                    | 6399 (2252–26937)   | 5728 (2807–18794)  | 6572 (3993–16234)  | 822 (-8132 to 3321)   |          |
| Ang-2, pg/mL                       |                     |                    |                    |                       | 0.19     |
| Weaning failure                    | 1838 (1293–2813)    | 1003 (675–1856)    | 1394 (908–1835)    | -516 (-1207 to -64)   |          |
| Weaning success                    | 1050 (844–1587)     | 729 (583–1103)     | 816 (544–1259)     | -172 (-555 to -126)   |          |
| Ang-2/Ang-1                        |                     |                    |                    |                       | 0.37     |
| Weaning failure                    | 0.81 (0.27–2.34)    | 0.18 (0.11–0.81)   | 0.34 (0.14–0.62)   | -0.07 (-1.59 to 0.03) |          |
| Weaning success                    | 0.16 (0.04–0.42)    | 0.13 (0.05–0.26)   | 0.11 (0.07–0.18)   | -0.03 (-0.21 to 0.03) |          |
| sTie2, pg/mL                       |                     |                    |                    |                       | 0.29     |
| Weaning failure                    | 11343 (6894–15052)  | 10408 (6370–13960) | 13187 (8817–15993) | 169 (-4463 to 2276)   |          |
| Weaning success                    | 13483 (10425–17899) | 11551 (9076–14293) | 12039 (9597–16091) | -1395 (-3563 to 418)  |          |
| Ang-1/sTie2                        |                     |                    |                    |                       | 0.69     |
| Weaning failure                    | 0.28 (0.09–1.13)    | 0.44 (0.20–0.70)   | 0.27 (0.22–0.72)   | 0.08 (-0.18 to 0.28)  |          |
| Weaning success                    | 0.56 (0.16–1.57)    | 0.62 (0.24–1.71)   | 0.68 (0.29–0.97)   | 0.13 (-0.54 to 0.61)  |          |

|                       |                        |                        |                        |                          |       |
|-----------------------|------------------------|------------------------|------------------------|--------------------------|-------|
| Endocan, pg/mL        |                        |                        |                        |                          | 0.001 |
| Weaning failure       | 1026 (421–1509)        | 1249 (802–3182)        | 1964 (957–3133)        | 688 (235–1257)           |       |
| Weaning success       | 877 (401–1577)         | 713 (427–1333)         | 666 (383–1325)         | -59 (-318 to 174)        |       |
| ICAM-1, pg/mL         |                        |                        |                        |                          | 0.83  |
| Weaning failure       | 289403 (191651–506711) | 289806(155966–423281)  | 270908 (171758–424315) | -21685 (-78258 to -3739) |       |
| Weaning success       | 347428 (208226–459056) | 310264 (163131–423758) | 309873 (174163–408408) | -24394 (-51910 to -4779) |       |
| IL-6, pg/mL           |                        |                        |                        |                          | 0.65  |
| Weaning failure       | 37.5 (11.2–58.9)       | 11.4 (7.4–18.4)        | 9.2 (4.6–36.3)         | -21.3 (-36.0 to 0.9)     |       |
| Weaning success       | 17.4 (4.6–41.7)        | 4.3 (2.8–6.5)          | 2.8 (1.5–7.0)          | -10.4 (-25.7 to -0.6)    |       |
| sRAGE, pg/mL          |                        |                        |                        |                          | 0.53  |
| Weaning failure       | 6433 (2866–13087)      | 2815 (1455–5566)       | 1988 (960–4043)        | -2164 (-7385 to -449)    |       |
| Weaning success       | 4904 (2253–6575)       | 2228 (1455–3263)       | 1217 (820–1766)        | -1725 (-3057 to -593)    |       |
| SP-D, pg/mL           |                        |                        |                        |                          | 0.007 |
| Weaning failure       | 6385 (1709–12215)      | 9986 (3763–21967)      | 5497 (1851–11808)      | -450 (-9460 to 3218)     |       |
| Weaning success       | 7116 (2524–14272)      | 13460 (8405–20337)     | 11079 (7592–19257)     | 3731 (856–6590)          |       |
| Syndecan-1, pg/mL     |                        |                        |                        |                          | 0.37  |
| Weaning failure       | 9000 (5581–12353)      | 10266 (5824–14762)     | 11333 (8237–16026)     | 1213 (-528 to 4045)      |       |
| Weaning success       | 5969 (4734–7670)       | 7626 (5693–9690)       | 7509 (5973–10727)      | 863 (-165 to 2117)       |       |
| TNF- $\alpha$ , pg/mL |                        |                        |                        |                          | 0.85  |
| Weaning failure       | 7.8 (6.5–11.6)         | 6.3 (5.2–9.0)          | 6.4 (5.7–8.7)          | -0.7 (-2.3 to 0.7)       |       |
| Weaning success       | 5.7 (4.1–7.9)          | 4.5 (3.3–6.1)          | 4.4 (3.1–5.8)          | -0.7 (-1.6 to 0.3)       |       |
| vWF, pg/mL            |                        |                        |                        |                          | 0.67  |
| Weaning failure       | 3158 (1305–5910)       | 1968 (1208–3297)       | 1977 (1377–3265)       | -354 (-1601 to 304)      |       |
| Weaning success       | 2613 (1204–4939)       | 2096 (1044–3818)       | 2324 (1050–3648)       | -123 (-612 to 261)       |       |

The median (interquartile range) values for the AUCs were calculated for variables with repeated measurements (baseline, day 4, and day 7). Ang-1: angiopoietin-1; Ang-2: angiopoietin-2; AUC: area under the curve; FiO<sub>2</sub>: fraction of inspired oxygen; ICAM-1: intercellular adhesion molecule-1; IL-6: interleukin-6; SpO<sub>2</sub>: pulse oximetric saturation; sTie2: soluble form of the Tie2 receptor; sRAGE: soluble receptor for advanced glycation end-products; SP-D: surfactant protein D; TNF- $\alpha$ : tumor necrosis factor- $\alpha$ ; vWF: von Willebrand factor.

**Table S2.** Models for predicting failure of liberation from oxygen therapy at day 28 following hospital admission through clinical variables and laboratory parameters.

|                                    | <b>AUC (95% CI)</b>     | <b><i>p</i></b> |
|------------------------------------|-------------------------|-----------------|
| qSOFA score                        | <b>0.73 (0.59–0.87)</b> | 0.005           |
| SpO <sub>2</sub> /FiO <sub>2</sub> | <b>0.74 (0.60–0.88)</b> | 0.004           |
| Day 4 – baseline                   | 0.42 (0.26–0.58)        | 0.34            |
| Day 7 – baseline                   | 0.64 (0.49–0.79)        | 0.10            |
| Radiologic score                   | 0.62 (0.45–0.79)        | 0.15            |
| Day 4 – baseline                   | 0.54 (0.36–0.71)        | 0.67            |
| Day 7 – baseline                   | 0.45 (0.27–0.63)        | 0.57            |
| Cycle threshold value              | 0.66 (0.50–0.82)        | 0.06            |
| Lymphocytes                        | 0.64 (0.48–0.80)        | 0.10            |
| Day 4 – baseline                   | 0.63 (0.49–0.78)        | 0.11            |
| Day 7 – baseline                   | 0.64 (0.50–0.78)        | 0.10            |
| Neutrophil lymphocyte ratio        | 0.62 (0.46–0.78)        | 0.16            |
| Day 4 – baseline                   | 0.69 (0.54–0.84)        | 0.03            |
| Day 7 – baseline                   | 0.65 (0.49–0.82)        | 0.07            |
| Lactate dehydrogenase              | 0.62 (0.46–0.78)        | 0.16            |
| Day 4 – baseline                   | 0.58 (0.42–0.74)        | 0.34            |
| Day 7 – baseline                   | 0.65 (0.49–0.80)        | 0.08            |
| C-reactive protein                 | 0.58 (0.41–0.75)        | 0.34            |
| Day 4 – baseline                   | 0.46 (0.29–0.64)        | 0.64            |
| Day 7 – baseline                   | 0.50 (0.31–0.68)        | 0.96            |
| Procalcitonin                      | <b>0.73 (0.57–0.88)</b> | 0.01            |
| D-dimer                            | <b>0.70 (0.54–0.85)</b> | 0.02            |
| Ang-1                              | 0.65 (0.49–0.81)        | 0.08            |
| Day 4 – baseline                   | 0.51 (0.35–0.66)        | 0.93            |
| Day 7 – baseline                   | 0.48 (0.33–0.63)        | 0.83            |
| Ang-2                              | <b>0.70 (0.54–0.86)</b> | 0.02            |
| Day 4 – baseline                   | 0.38 (0.19–0.56)        | 0.15            |
| Day 7 – baseline                   | 0.35 (0.19–0.52)        | 0.08            |
| Ang-2/Ang-1                        | <b>0.71 (0.56–0.86)</b> | 0.01            |
| Day 4 – baseline                   | 0.46 (0.27–0.65)        | 0.62            |
| Day 7 – baseline                   | 0.42 (0.23–0.60)        | 0.31            |
| sTie2                              | 0.38 (0.21–0.54)        | 0.14            |
| Day 4 – baseline                   | 0.57 (0.39–0.76)        | 0.40            |
| Day 7 – baseline                   | 0.62 (0.43–0.80)        | 0.17            |
| Ang-1/sTie2                        | 0.62 (0.46–0.78)        | 0.14            |
| Day 4 – baseline                   | 0.52 (0.37–0.67)        | 0.82            |
| Day 7 – baseline                   | 0.54 (0.38–0.69)        | 0.67            |
| Endocan                            | 0.50 (0.33–0.66)        | 0.96            |
| Day 4 – baseline                   | <b>0.75 (0.60–0.90)</b> | 0.003           |
| Day 7 – baseline                   | <b>0.81 (0.67–0.94)</b> | <0.001          |
| ICAM-1                             | 0.50 (0.33–0.67)        | 0.99            |
| Day 4 – baseline                   | 0.54 (0.36–0.72)        | 0.62            |
| Day 7 – baseline                   | 0.50 (0.33–0.67)        | 0.99            |
| IL-6                               | 0.64 (0.49–0.80)        | 0.08            |
| Day 4 – baseline                   | 0.44 (0.26–0.61)        | 0.46            |
| Day 7 – baseline                   | 0.48 (0.29–0.67)        | 0.81            |
| sRAGE                              | 0.62 (0.44–0.80)        | 0.14            |

|                  |                         |       |
|------------------|-------------------------|-------|
| Day 4 – baseline | 0.41 (0.23–0.59)        | 0.27  |
| Day 7 – baseline | 0.47 (0.28–0.66)        | 0.71  |
| SP-D             | 0.64 (0.48–0.80)        | 0.09  |
| Day 4 – baseline | 0.25 (0.10–0.40)        | 0.003 |
| Day 7 – baseline | 0.30 (0.14–0.46)        | 0.02  |
| Syndecan-1       | 0.66 (0.49–0.83)        | 0.06  |
| Day 4 – baseline | 0.55 (0.36–0.73)        | 0.59  |
| Day 7 – baseline | 0.64 (0.49–0.79)        | 0.09  |
| TNF- $\alpha$    | <b>0.73 (0.60–0.87)</b> | 0.006 |
| Day 4 – baseline | 0.50 (0.33–0.68)        | 0.96  |
| Day 7 – baseline | 0.46 (0.28–0.64)        | 0.62  |
| vWF              | 0.50 (0.33–0.67)        | 0.99  |
| Day 4 – baseline | 0.44 (0.28–0.60)        | 0.49  |
| Day 7 – baseline | 0.51 (0.35–0.68)        | 0.88  |

---

Ang-1: angiopoietin-1; Ang-2: angiopoietin-2; AUC: area under the curve; CI: confidence interval; FiO<sub>2</sub>: fraction of inspired oxygen; ICAM-1: intercellular adhesion molecule-1; IL-6: interleukin-6; SpO<sub>2</sub>: pulse oximetric saturation; qSOFA: quick Sequential Organ Failure Assessment; sTie2: soluble form of the Tie2 receptor; sRAGE: soluble receptor for advanced glycation end-products; SP-D: surfactant protein D; TNF- $\alpha$ : tumor necrosis factor- $\alpha$ ; vWF: von Willebrand factor.
